# Supplementary material for: Aberrant Splicing in GJB1 and the Relevance of 5′ UTR in CMTX1 Pathogenesis
Source: Brain Sci. 2020 Dec 27;11(1):24. doi: 10.3390/brainsci11010024 (PMC7824018; doi:10.3390/brainsci11010024)
Supplement: Supplementary file 1 [file brainsci-11-00024-s001.pdf]

## Supplementary Materials

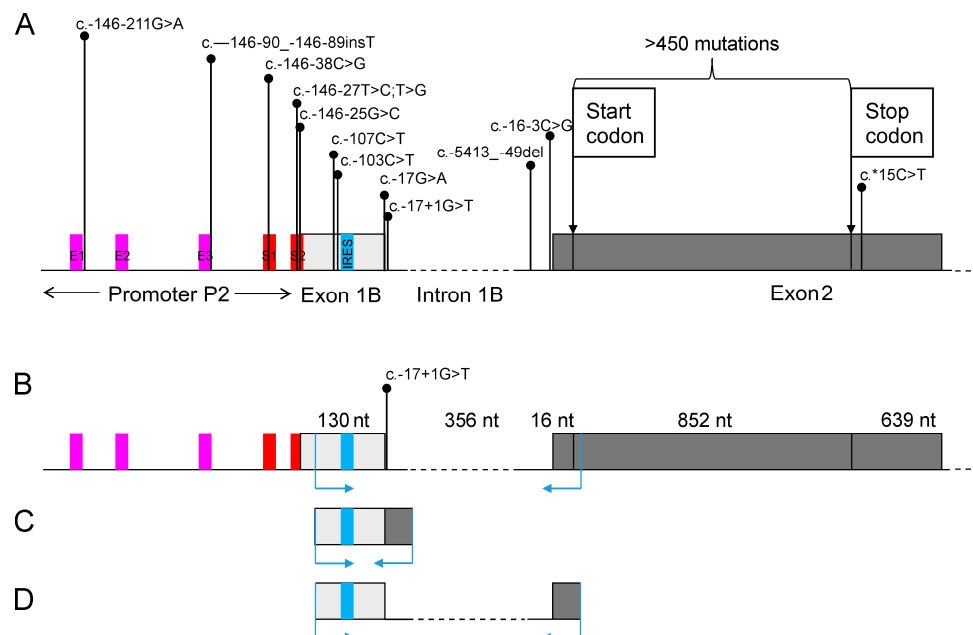

**Figure S1.** *GJB1* gene structure and schematic drawing of the experimental design, highlighting the different length of splice variants. (a) Gene structure and known mutations in the untranslated regions of *GJB1*. Pink boxes E1-E3 represent EGR2 binding sites, while red boxes S1-S2 mark SOX10 binding sites. Internal Ribosomal Entry Site (IRES) is highlighted by the homonym light blue box. (b) Experimental design: a couple of primers (GJB1-ex1B\_1 Fw, GJB1-5'UTR\_3 Rv) was used to amplify *GJB1* noncoding cDNA in order to assess the effect of the c.-17+1G>T mutation. (c) Regular splicing: correct removal of intron 1B generates a cDNA fragment of expected 131 nucleotides in wild type samples. (d) Transcriptional analysis in mutant samples: since c.-17+1G>T mutation abolishes a donor splice-site consensus sequence, intron 1B should be retained in its complete length, thus producing a longer fragment of cDNA.

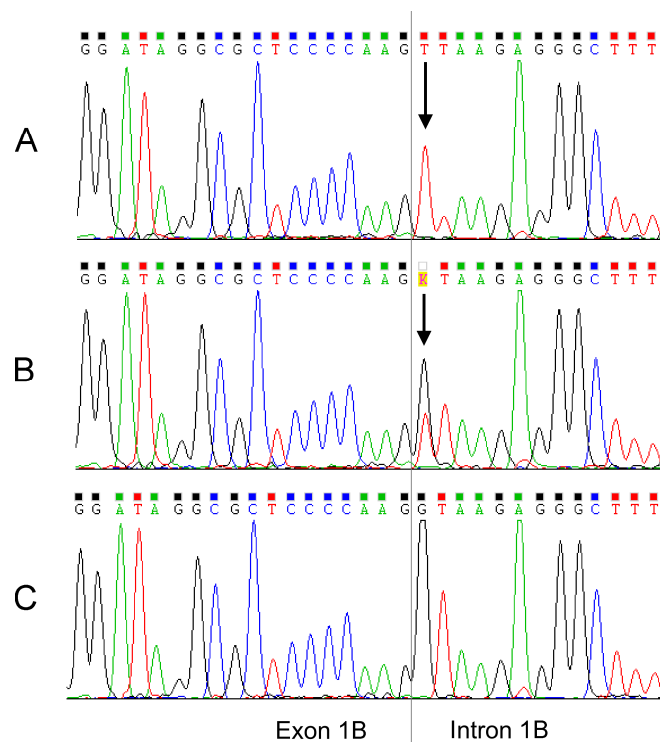

**Figure S2.** Sequencing chromatograms illustrating the results of *GJB1* genetic testing in some representative family members. (A) a hemizygous CMTX1 male (II-2, first family); (B) a heterozygous CMTX1 female (III-9, second family); (C) a healthy individual (II-4, first family). An arrow points to the c.-17+1G>T mutation.

**Table S1.** List of used primers. After exclusion of mutations in *GJB1* exon 2 coding sequence, 5'UTR was sequenced from nt g.12671 to g.13503. Nucleotide numbering was in relation to NG\_008357.1, covering *GJB1* transcript NM\_000166.5. *PMP22* and *GAPDH* nucleotide numberings were according to NM\_000304.3 and NM\_002046.5, respectively. Primer pairs GJB1-5'UTR\_1, GJB1-5'UTR\_2 and GJB1-5'UTR\_3 were used to sequence 5'UTR genomic DNA, while primer pairs GJB1-ex2 were used to amplify cDNA coding sequence. GJB1-ex1B\_1 was used with reverse primer GJB1-5'UTR\_3 to amplify and sequence 5'UTR cDNA; GJB1-ex1B\_2 was used in nested sequencing on the previous PCR amplification product.

| Primers pair name | Position (first nt; last nt of the amplicon) | Forward sequence      | Reverse sequence        |
|-------------------|----------------------------------------------|-----------------------|-------------------------|
| GJB1-5'UTR_1      | g.12671; g.12993                             | taagcttctgacggggccat  | ctgctttataccagtgctcgc   |
| GJB1-5'UTR_2      | g.12907; g.13219                             | gaagtcagggcgttgatct   | gcccatcttggtccgatatcag  |
| GJB1-5'UTR_3      | g.13139; g.13503                             | ttgagtttgcccaggtctg   | agttcatcctgcctcattcacac |
| GJB1 ex2          | g.13615; g.13943                             | cagagagtgtgtggggtgatg | gaagacggcctcaacaacag    |
| GJB1-ex1B_1       | g.13017                                      | ggtgatgaattgggacgca   |                         |
| GJB1-ex1B_2       | g.13078                                      | ccataggggacctgtctggg  |                         |
| PMP22 ex1-4       | c.21; c.458                                  | atcatcgctctccacgtcg   | atagatgacaccgctgagaa    |
| GAPDH ex6-8       | c.386; c.636                                 | ccatgttcgtcatgggtgtg  | gccagtagaggcagggatg     |
